# Supplementary material for: Nanoliposomal irinotecan with fluorouracil for the treatment of advanced pancreatic cancer, a single institution experience
Source: Springer Nature journal article supplement (doi:10.1186/s12885-018-4605-1), 2018-06-27
Supplement: MOESM1 [file 15888946]

**Supplemental Table 1**

|                                 | <b><i>N = 41 (%)</i></b> |
|---------------------------------|--------------------------|
| <b><i>KRAS mutation</i></b>     | <b>34 (83)</b>           |
| G12D                            | 15 (44)                  |
| G12R                            | 9 (26)                   |
| G12V                            | 5 (15)                   |
| G12C                            | 3 (9)                    |
| G12I                            | 1 (3)                    |
| Q61R                            | 1 (3)                    |
| <b><i>TP53 mutation</i></b>     | <b>27 (66)</b>           |
| <b><i>CDKN2A mutation</i></b>   | <b>12 (29)</b>           |
| <b><i>SMAD4 mutation</i></b>    | <b>11 (27)</b>           |
| <b><i>Germline mutation</i></b> | <b>9 (21)</b>            |
| BRCA1                           | 1 (11)                   |
| BRCA2                           | 3 (33)                   |
| NF1                             | 1 (11)                   |
| APC                             | 2 (22)                   |
| ATM                             | 1 (11)                   |
| MLH1                            | 1 (11)                   |

**Supplemental Figure 1**

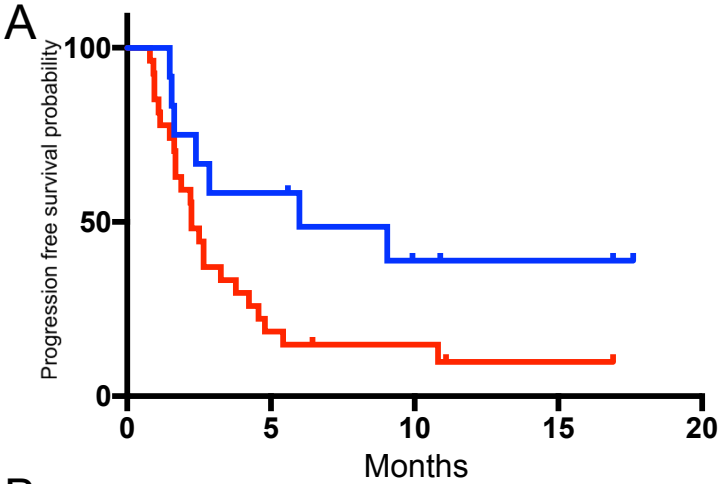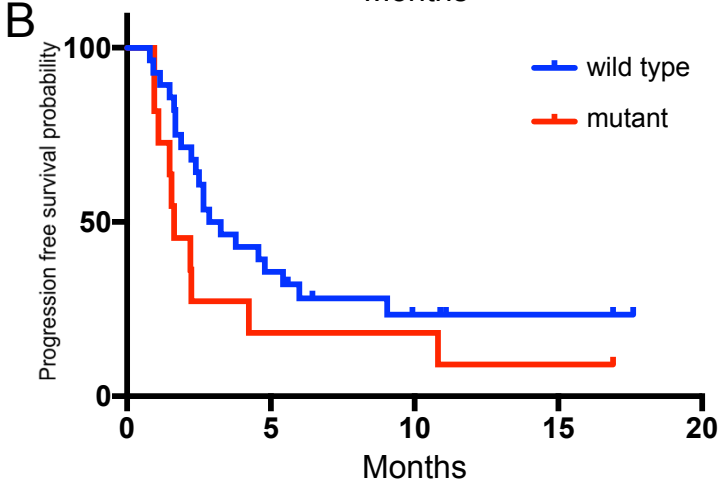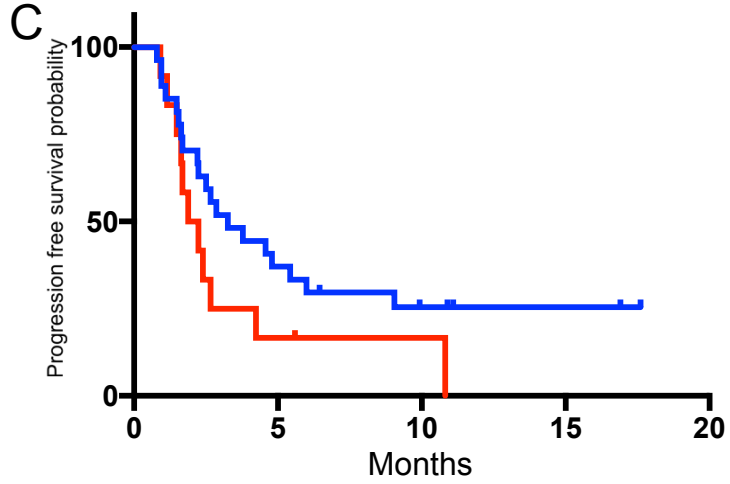

| Gene   | status    | mPFS (mo) | p     | HR                  |
|--------|-----------|-----------|-------|---------------------|
| TP53   | wild type | 6.0       | 0.039 | 0.43 (0.21 to 0.88) |
|        | mutated   | 2.2       |       |                     |
| SMAD4  | wild type | 3.1       | 0.11  | 0.55 (0.23 to 1.31) |
|        | mutated   | 1.6       |       |                     |
| CDKN2A | wild type | 3.3       | 0.11  | 0.56 (0.24 to 1.28) |
|        | mutated   | 2.1       |       |                     |
